# Supplementary material for: A first principles study of oxygen reduction reaction on a Pt(111) surface modified by a subsurface transition metal M (M = Ni, Co, or Fe)
Source: Royal Society of Chemistry journal article supplement (doi:10.1039/c1cp21687b), 2011-01-01
Supplement: c1cp21687b.pdf [file c1cp21687b.pdf]

## Supplemental Materials

**Table 1:** Calculated imaginary vibration frequencies ( $\text{cm}^{-1}$ ) of the transition states of various ORR elementary steps on pure Pt and modified Pt (Pt/Ni, Pt/Co, and Pt/Fe) (111) surfaces.

|                                                                                 | Pt  | Pt/Ni | Pt/Co | Pt/Fe |
|---------------------------------------------------------------------------------|-----|-------|-------|-------|
| O–O bond scission                                                               |     |       |       |       |
| $\text{O}_2^* \longrightarrow \text{O}^* + \text{O}^*$                          | 243 | 368   | 234   | 482   |
| $\text{OOH}^* \longrightarrow \text{O}^* + \text{OH}^*$                         | 238 | 341   | 467   | 461   |
| $\text{H}_2\text{O}_2^* \longrightarrow \text{OH}^* + \text{OH}^*$              | 327 | 186   | 113   | 134   |
| Protonation                                                                     |     |       |       |       |
| $\text{O}_2^* + \text{H}^+ + \text{e}^- \longrightarrow \text{OOH}^*$           | 627 | 484   | 498   | 482   |
| $\text{OOH}^* + \text{H}^+ + \text{e}^- \longrightarrow \text{H}_2\text{O}_2^*$ | 386 | 281   | 296   | 335   |
| $\text{O}^* + \text{H}^+ + \text{e}^- \longrightarrow \text{OH}^*$              | 679 | 580   | 595   | 403   |
| $\text{OH}^* + \text{H}^+ + \text{e}^- \longrightarrow \text{H}_2\text{O}^*$    | 143 | 153   | 239   | 321   |

**Table 2:** Calculated representative bond lengths (in unit of Å) in the initial (I), transition (T), and final (F) states of various ORR elementary steps on pure Pt and modified Pt (Pt/Ni, Pt/Co, and Pt/Fe) (111) surfaces. For the three O–O bond scission reactions, the lengths of O–O bond are given. For the four protonation reactions, the lengths of O–H bond are given.

| reactions                                    | Pt   |      |      | Pt/Ni |      |      | Pt/Co |      |      | Pt/Fe |      |      |
|----------------------------------------------|------|------|------|-------|------|------|-------|------|------|-------|------|------|
|                                              | I    | T    | F    | I     | T    | F    | I     | T    | F    | I     | T    | F    |
| <b>O–O bond scission</b>                     |      |      |      |       |      |      |       |      |      |       |      |      |
| $O_2 \longrightarrow O^* + O^*$              | 1.35 | 1.98 | 2.82 | 1.33  | 1.99 | 2.82 | 1.34  | 1.98 | 2.82 | 1.31  | 1.95 | 2.82 |
| $OOH^* \longrightarrow O^* + OH^*$           | 1.47 | 1.81 | 3.43 | 1.46  | 1.88 | 3.41 | 1.46  | 1.85 | 3.43 | 1.46  | 1.88 | 3.41 |
| $H_2O_2^* \longrightarrow OH^* + OH^*$       | 1.47 | 1.66 | 2.82 | 1.47  | 1.47 | 2.82 | 1.47  | 1.47 | 2.83 | 1.47  | 1.47 | 2.81 |
| <b>Protonation</b>                           |      |      |      |       |      |      |       |      |      |       |      |      |
| $O_2^* + H^+ + e^- \longrightarrow OOH^*$    | 2.74 | 1.53 | 0.99 | 2.87  | 1.88 | 0.99 | 2.92  | 1.88 | 0.98 | 1.31  | 1.85 | 0.98 |
| $OOH^* + H^+ + e^- \longrightarrow H_2O_2^*$ | 2.93 | 1.56 | 0.98 | 3.05  | 1.75 | 0.98 | 3.00  | 1.78 | 0.98 | 2.94  | 1.79 | 0.98 |
| $O^* + H^+ + e^- \longrightarrow OH^*$       | 3.28 | 2.10 | 0.98 | 3.28  | 1.56 | 0.98 | 3.27  | 1.74 | 0.98 | 3.28  | 1.71 | 0.98 |
| $OH^* + H^+ + e^- \longrightarrow H_2O^*$    | 2.69 | 1.81 | 0.98 | 2.68  | 2.00 | 0.98 | 2.69  | 1.93 | 0.98 | 2.70  | 1.93 | 0.98 |
